# Supplementary material for: Comparison of Single Target-Controlled Infusion Pump-Delivered Mixed Propofol and Remifentanil with Two Target-Controlled Infusion Pumps-Delivered Propofol and Remifentanil in Patients Undergoing Breast Cancer Surgery—A Prospective Study
Source: MDPI journal article supplement (doi:10.3390/ijerph20032094), 2023-01-23
Supplement: s1 [file s1]

**Supplementary Table S1.** Remifentanil-propofol mixture use in the clinical or laboratory studies.

| Study (n)                                    | Type of procedure           | The concentration of RP mixture                                   |
|----------------------------------------------|-----------------------------|-------------------------------------------------------------------|
| 2004, Berkenbosch et al. <sup>4</sup> (n=15) | Fiberoptic bronchoscopy     | R (15-20 µg.ml <sup>-1</sup> ) and P (10 mg.mL <sup>-1</sup> )    |
| 2005, Tsui et al. <sup>5</sup> (n=56)        | MRI                         | R (10 µg.ml <sup>-1</sup> ) and P (10 mg.mL <sup>-1</sup> )       |
| 2013, Pedersen et al. <sup>6</sup> (n=120)   | MRI                         | R (10 µg.ml <sup>-1</sup> ) and P (10 mg.mL <sup>-1</sup> )       |
| 2020, Lai et al. <sup>7</sup> (n=236)        | Colonoscopy                 | R (2.5 µg.ml <sup>-1</sup> ) and P (10 mg.mL <sup>-1</sup> )      |
| 2008, Mandel et al. <sup>8</sup> (n=50)      | Colonoscopy                 | R (10 µg.ml <sup>-1</sup> ) and P (10 mg.mL <sup>-1</sup> )       |
| 2012, Joo et al. <sup>9</sup> (n=75)         | Breast biopsy               | R (25 µg.ml <sup>-1</sup> ) and P (10 mg.mL <sup>-1</sup> )       |
| 2001, Joo et al. <sup>10</sup> (n=120)       | Shock wave lithotripsy      | R (10 µg.ml <sup>-1</sup> ) and P (5 mg.mL <sup>-1</sup> )        |
| 1999, Fish et al. <sup>11</sup> (n=71)       | Daycase urological surgery  | R (2.5 µg.ml <sup>-1</sup> ) and P (10 mg.mL <sup>-1</sup> )      |
| 2014, Goudra et al. <sup>12</sup> (n=1)      | Recurrent radiation therapy | R (5 µg.ml <sup>-1</sup> ) and P (5 mg.mL <sup>-1</sup> )         |
| 2012, Kramer et al. <sup>14</sup> (n=37)     | Dental extraction           | R (5 µg.ml <sup>-1</sup> ) and P (10 mg.mL <sup>-1</sup> )        |
| 2012, Mazanikov et al. <sup>15</sup> (n=81)  | ERCP                        | R (20 µg.ml <sup>-1</sup> ) and P (10 mg.mL <sup>-1</sup> )       |
| 2005, Brady et al. <sup>16</sup> (n=49)      | Ambulatory surgery          | R (25 µg.ml <sup>-1</sup> ) and P (5 mg.mL <sup>-1</sup> )        |
| 2020, Bagshaw et al. <sup>17</sup> (n=873)   | Variety of procedures       | R (5 µg.ml <sup>-1</sup> ) and P (10 mg.mL <sup>-1</sup> )        |
| 2021, Bakan et al. <sup>18</sup> (n=96)      | Thyroidectomy               | R (20 or 30 µg.ml <sup>-1</sup> ) and P (10 mg.mL <sup>-1</sup> ) |
| 2000, Stewart et al. <sup>20</sup> (n=12)    | A laboratory study          | R (5 or 50 µg.ml <sup>-1</sup> ) and P (10 mg.mL <sup>-1</sup> )  |
| 2020, Henkel et al. <sup>39</sup> (n=3)      | A laboratory study          | R (10-50 µg.ml <sup>-1</sup> ) and P (10 mg.mL <sup>-1</sup> )    |
| 2022, Wylie et al. <sup>40</sup> (n=5)       | A laboratory-based study    | R (5 µg.ml <sup>-1</sup> ) and P (10 mg.mL <sup>-1</sup> )        |

MRI: magnetic resonance imaging; ERCP: endoscopic retrograde cholangiopancreatography;  
R: remifentanil; P: propofol.
